# Supplementary material for: Exercise Intolerance and Oxygen Desaturation in Patients with Parkinson’s Disease: Triggers for Respiratory Rehabilitation?
Source: MDPI journal article supplement (doi:10.3390/ijerph182312298), 2021-11-23
Supplement: s1 [file s1]

## SUPPLEMENTARY MATERIALS

**Table S1.** Spearman correlations of Motor ADL, Motor function and Exercise tolerance with all other variables

|                               | Motor ADL (UPDRS II) |                   | Motor function (UPDRS III) |                   | Exercise (6MWT_meters %prd) |                   |
|-------------------------------|----------------------|-------------------|----------------------------|-------------------|-----------------------------|-------------------|
|                               | Spearman r           | P (two-tailed)    | Spearman r                 | P (two-tailed)    | Spearman r                  | P (two-tailed)    |
| <b>BMI (kg/m<sup>2</sup>)</b> | 0.1597               | 0.2441            | 0.1189                     | 0.3873            | -----                       | -----             |
| <b>Age, years</b>             | 0.1998               | 0.1435            | 0.1597                     | 0.2441            | -----                       | -----             |
| <b>CIRS1, score</b>           | <b>0.6255</b>        | <b>&lt;0.0001</b> | <b>0.5511</b>              | <b>&lt;0.0001</b> | <b>-0.5740</b>              | <b>&lt;0.0001</b> |
| <b>CIRS2, score</b>           | <b>0.5124</b>        | <b>&lt;0.0001</b> | <b>0.4828</b>              | <b>0.0002</b>     | <b>-0.5947</b>              | <b>&lt;0.0001</b> |
| <b>UPDRS II, score</b>        | -----                | -----             | -----                      | -----             | <b>-0.5336</b>              | <b>&lt;0.0001</b> |
| <b>UPDRS III, score</b>       | -----                | -----             | -----                      | -----             | <b>-0.4734</b>              | <b>0.0003</b>     |
| <b>Barthel Index, score</b>   | <b>-0.7088</b>       | <b>&lt;0.0001</b> | <b>-0.6018</b>             | <b>&lt;0.0001</b> | <b>0.6574</b>               | <b>&lt;0.0001</b> |
| <b>FIM, score</b>             | <b>-0.7067</b>       | <b>&lt;0.0001</b> | <b>-0.6426</b>             | <b>&lt;0.0001</b> | <b>0.5250</b>               | <b>&lt;0.0001</b> |
| <b>Berg balance, score</b>    | <b>-0.3959</b>       | <b>0.0028</b>     | <b>-0.3359</b>             | <b>0.0122</b>     | <b>0.4203</b>               | <b>0.0017</b>     |

|                                            |                |                   |                |               |                |               |
|--------------------------------------------|----------------|-------------------|----------------|---------------|----------------|---------------|
| <b>FEV1 % pred.</b>                        | -0.1520        | 0.2679            | -0.1969        | 0.1495        | <b>0.3778</b>  | <b>0.0053</b> |
| <b>FVC % pred.</b>                         | -0.1040        | 0.4497            | -0.1302        | 0.3433        | <b>0.4449</b>  | <b>0.0008</b> |
| <b>FEV1/FVC</b>                            | -0.1382        | 0.3144            | -0.2502        | 0.0654        | -0.0716        | 0.6101        |
| <b>PEF % pred.</b>                         | <b>-0.4613</b> | <b>0.0004</b>     | <b>-0.4090</b> | <b>0.0019</b> | <b>0.4266</b>  | <b>0.0014</b> |
| <b>MIP, % pred.</b>                        | <b>-0.5834</b> | <b>&lt;0.0001</b> | <b>-0.4290</b> | <b>0.0012</b> | <b>0.2860</b>  | <b>0.0398</b> |
| <b>MEP, % pred.</b>                        | -0.2211        | 0.1048            | -0.1935        | 0.1569        | <b>0.2756</b>  | <b>0.0458</b> |
| <b>PCEF (L/min)</b>                        | <b>-0.4870</b> | <b>0.0002</b>     | <b>-0.3638</b> | <b>0.0063</b> | <b>0.4818</b>  | <b>0.0002</b> |
| <b>ODI, n</b>                              | <b>0.3056</b>  | <b>0.0246</b>     | <b>0.3322</b>  | <b>0.0141</b> | <b>-0.3176</b> | <b>0.0217</b> |
| <b>Nocturnal SatO<sub>2</sub> T90, %</b>   | <b>0.4133</b>  | <b>0.0017</b>     | <b>0.4443</b>  | <b>0.0007</b> | <b>-0.4441</b> | <b>0.0009</b> |
| <b>Nocturnal SatO<sub>2</sub> mean, %</b>  | <b>-0.4770</b> | <b>0.0002</b>     | <b>-0.4185</b> | <b>0.0015</b> | <b>0.4236</b>  | <b>0.0016</b> |
| <b>Nocturnal SatO<sub>2</sub> nadir, %</b> | -0.2567        | 0.0662            | <b>-0.3530</b> | <b>0.0102</b> | 0.2534         | 0.0758        |
| <b>6MWD SatO<sub>2</sub> bas, %</b>        | <b>-0.3881</b> | <b>0.0037</b>     | <b>-0.2988</b> | <b>0.0282</b> | 0.2544         | 0.0660        |
| <b>6MWD SatO<sub>2</sub> mean, %</b>       | <b>-0.2976</b> | <b>0.0305</b>     | <b>-0.3403</b> | <b>0.0127</b> | 0.2166         | 0.1193        |
| <b>6MWD SatO<sub>2</sub> nadir, %</b>      | -0.2335        | 0.0924            | <b>-0.3216</b> | <b>0.0189</b> | 0.2117         | 0.1280        |
| <b>PDSS</b>                                | -0.1661        | 0.2441            | -0.1364        | 0.3400        | <b>0.3170</b>  | <b>0.0265</b> |
| <b>Epworth</b>                             | <b>0.3485</b>  | <b>0.0105</b>     | <b>0.3037</b>  | <b>0.0270</b> | -0.0567        | 0.6926        |

**Legend:** BMI=Body mass index; CIRS=Cumulative Illness Rating Scale severity; UPDRS= Unified Parkinson's Disease Rating Scale; FIM= Functional Independence Measure; FEV1=Forced expiratory volume at 1 second ; % prd=% of predicted value; FVC= Forced vital capacity; PEF=peak expiratory flow; MIP=maximal inspiratory pressure; MEP=maximal expiratory pressure; PCEF=peak cough expiratory flow; ODI=apnea-hypopnea index; 6MWD=6-min walking distance; PDSS=Parkinson's Disease Sleep Scale 2.
